# Supplementary material
Source: MDPI journal article supplement (https://www.mdpi.com/2571-8797/5/4/62)
Supplement: s1 [file s1]

**Table S1.** A few selected patents on innovative application of keratinous biomass

| Title                                                                                                                | Patent Number  | Weblink                                                                                                                                                                                                                                                                                   | Inventor       | Status  |
|----------------------------------------------------------------------------------------------------------------------|----------------|-------------------------------------------------------------------------------------------------------------------------------------------------------------------------------------------------------------------------------------------------------------------------------------------|----------------|---------|
| Method of preparing of keratin fertilizer with an additive of humic acids in colloid form                            | WO2016182515A1 | <a href="https://patents.google.com/patent/WO2016182515A1/en?q=(keratin+fertilizer)&amp;oq=keratin+fertilizer">https://patents.google.com/patent/WO2016182515A1/en?q=(keratin+fertilizer)&amp;oq=keratin+fertilizer</a>                                                                   | Szoke et al.   | Active  |
| Process for production of keratin microfibers and protein hydrolysate from poultry feathers via microbial hydrolysis | EP4050107A1    | <a href="https://patents.google.com/patent/EP4050107A1/en?q=(keratin+fertilizer)&amp;oq=keratin+fertilizer&amp;page=8">https://patents.google.com/patent/EP4050107A1/en?q=(keratin+fertilizer)&amp;oq=keratin+fertilizer&amp;page=8</a>                                                   | Ibrahim, M.H.A | Pending |
| Agricultural admixtures                                                                                              | EP3665140B1    | <a href="https://patents.google.com/patent/EP3665140B1/en?q=(keratin+fertilizer)&amp;oq=keratin+fertilizer&amp;page=3">https://patents.google.com/patent/EP3665140B1/en?q=(keratin+fertilizer)&amp;oq=keratin+fertilizer&amp;page=3</a>                                                   | Morash et al.  | Active  |
| Digestion of keratin                                                                                                 | US10030099B2   | <a href="https://patents.google.com/patent/US10030099B2/en?q=(keratin+fertilizer)&amp;oq=keratin+fertilizer&amp;page=3">https://patents.google.com/patent/US10030099B2/en?q=(keratin+fertilizer)&amp;oq=keratin+fertilizer&amp;page=3</a>                                                 | Tabor et al.   | Active  |
| Fertilizer based on keratin hydrolysate and method of preparation                                                    | RO133338A2     | <a href="https://patents.google.com/patent/RO133338A2/en?q=(keratin+hydrolysate)&amp;oq=keratin+hydrolysate">https://patents.google.com/patent/RO133338A2/en?q=(keratin+hydrolysate)&amp;oq=keratin+hydrolysate</a>                                                                       | Gaidau et al.  | —       |
| Keratin hydrolysate for oral cosmetic use                                                                            | EP3675811B1    | <a href="https://patents.google.com/patent/EP3675811B1/en?q=(keratin+hydrolysate)&amp;oq=keratin+hydrolysate">https://patents.google.com/patent/EP3675811B1/en?q=(keratin+hydrolysate)&amp;oq=keratin+hydrolysate</a>                                                                     | Sergheraert R. | Active  |
| Improved method for producing highly digestible hydrolyzed keratinaceous material                                    | AU2021362720A1 | <a href="https://patents.google.com/patent/AU2021362720A1/en?q=(keratin+feed)&amp;oq=keratin+feed">https://patents.google.com/patent/AU2021362720A1/en?q=(keratin+feed)&amp;oq=keratin+feed</a>                                                                                           | Fillières R.   | Pending |
| Methods for extracting keratin proteins                                                                              | US11034722B2   | <a href="https://patents.google.com/patent/US11034722B2/en?q=(keratin+protein)&amp;oq=keratin+protein">https://patents.google.com/patent/US11034722B2/en?q=(keratin+protein)&amp;oq=keratin+protein</a>                                                                                   | Burnett L.     | Active  |
| Use of nitrogen-containing compounds as plasticizers for peptide-based biopolymers and uses thereof                  | US10595546B2   | <a href="https://patents.google.com/patent/US10595546B2/en?q=(feather+keratin)&amp;type=PATENT&amp;oq=(feather+keratin)+type:PATENT&amp;page=6">https://patents.google.com/patent/US10595546B2/en?q=(feather+keratin)&amp;type=PATENT&amp;oq=(feather+keratin)+type:PATENT&amp;page=6</a> | Schmidt W.F.   | Active  |

**Table S2.** Qualitative evaluation of sediment-associated bacteria for lipolytic potentials on tween 80 amended agar media

| Isolate Code  | Precipitation<br>around colony | Precipitation zone<br>(mm) |
|---------------|--------------------------------|----------------------------|
| ACT001        | ND                             | 0                          |
| ACT002        | ND                             | 0                          |
| ACT003        | +                              | 9                          |
| ACT004        | ++                             | 15                         |
| ACT005        | ND                             | 0                          |
| ACT006        | ND                             | 0                          |
| ACT007        | ND                             | 0                          |
| ACT008        | ND                             | 0                          |
| ACT009        | ND                             | 0                          |
| ACT010 (TTs1) | +++                            | 30                         |
| ACT011        | ND                             | 0                          |
| ACT012        | ND                             | 0                          |
| ACT013        | +                              | 11                         |
| ACT014        | ND                             | 0                          |
| ACT015        | ND                             | 0                          |
| ACT016        | +                              | 12                         |
| ACT017        | ND                             | 0                          |
| ACT018        | ND                             | 0                          |
| ACT019        | +                              | 10                         |
| ACT020        | ND                             | 0                          |

(+) = Small precipitate; (++) = moderate precipitate; (+++) = large precipitate;  
 ND – precipitate not detected.

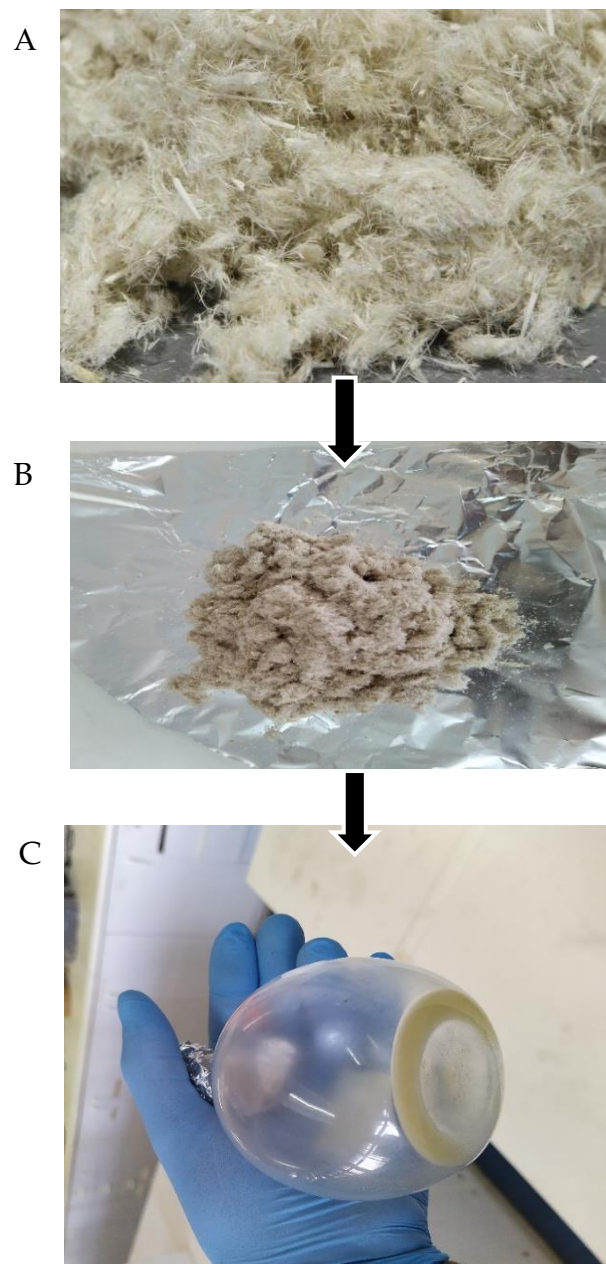

**Figure S1:** A representative flow of crude fat extraction showing (A) raw chicken feather, (B) chicken feather post-extraction (C) crude fat at the bottom of the flask.
